# Supplementary material for: Towards a low-spin configuration in extended metal atom chains. Theoretical study of trimetallic systems with 22 metal electrons
Source: Royal Society of Chemistry journal article supplement (doi:10.1039/c1dt11260k), 2011-10-31
Supplement: c1dt11260k.pdf [file c1dt11260k.pdf]

# Towards a Low-Spin Configuration in Extended Metal Atom Chains. Theoretical Study of Trimetallic Systems with 22 Metal Electrons

**Zahra Tabookht,<sup>1</sup> Coen de Graaf,<sup>1,2</sup> Xavier López<sup>1,\*</sup>**

<sup>1</sup>Departament de Química Física i Inorgànica, Universitat Rovira i Virgili, Marcel·lí  
Domingo s/n, 43007, Tarragona, Spain

<sup>2</sup> Institució Catalana de Recerca i Estudis Avançats (ICREA), Passeig Lluís Companys  
23, 08010, Barcelona, Spain

**Supporting Information**

**Figure S1.** Singly-occupied molecular orbitals (alpha and beta spatial parts) obtained from a DFT broken-symmetry calculation for  $\text{CoPdCo}(\text{dpa})_4\text{Cl}_2$ .

*Alpha orbitals*

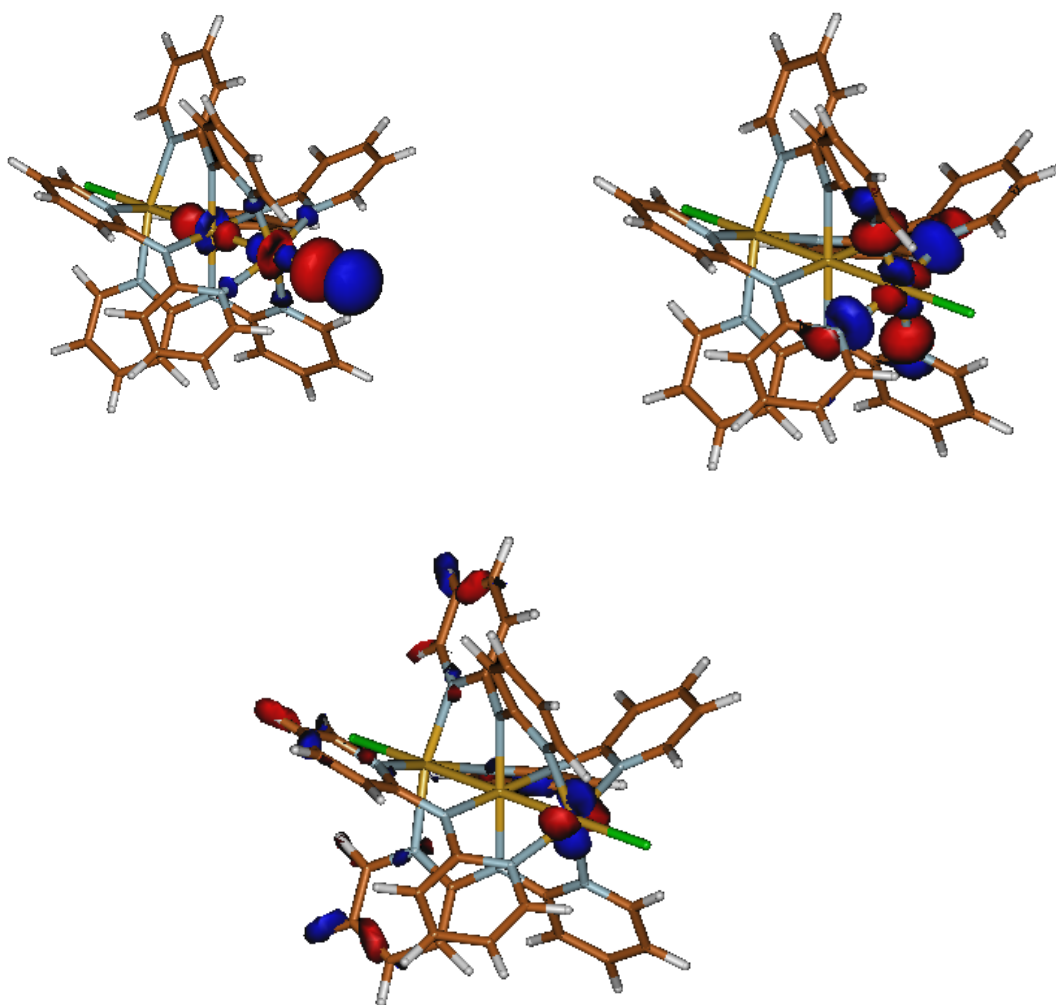

*Beta orbitals*

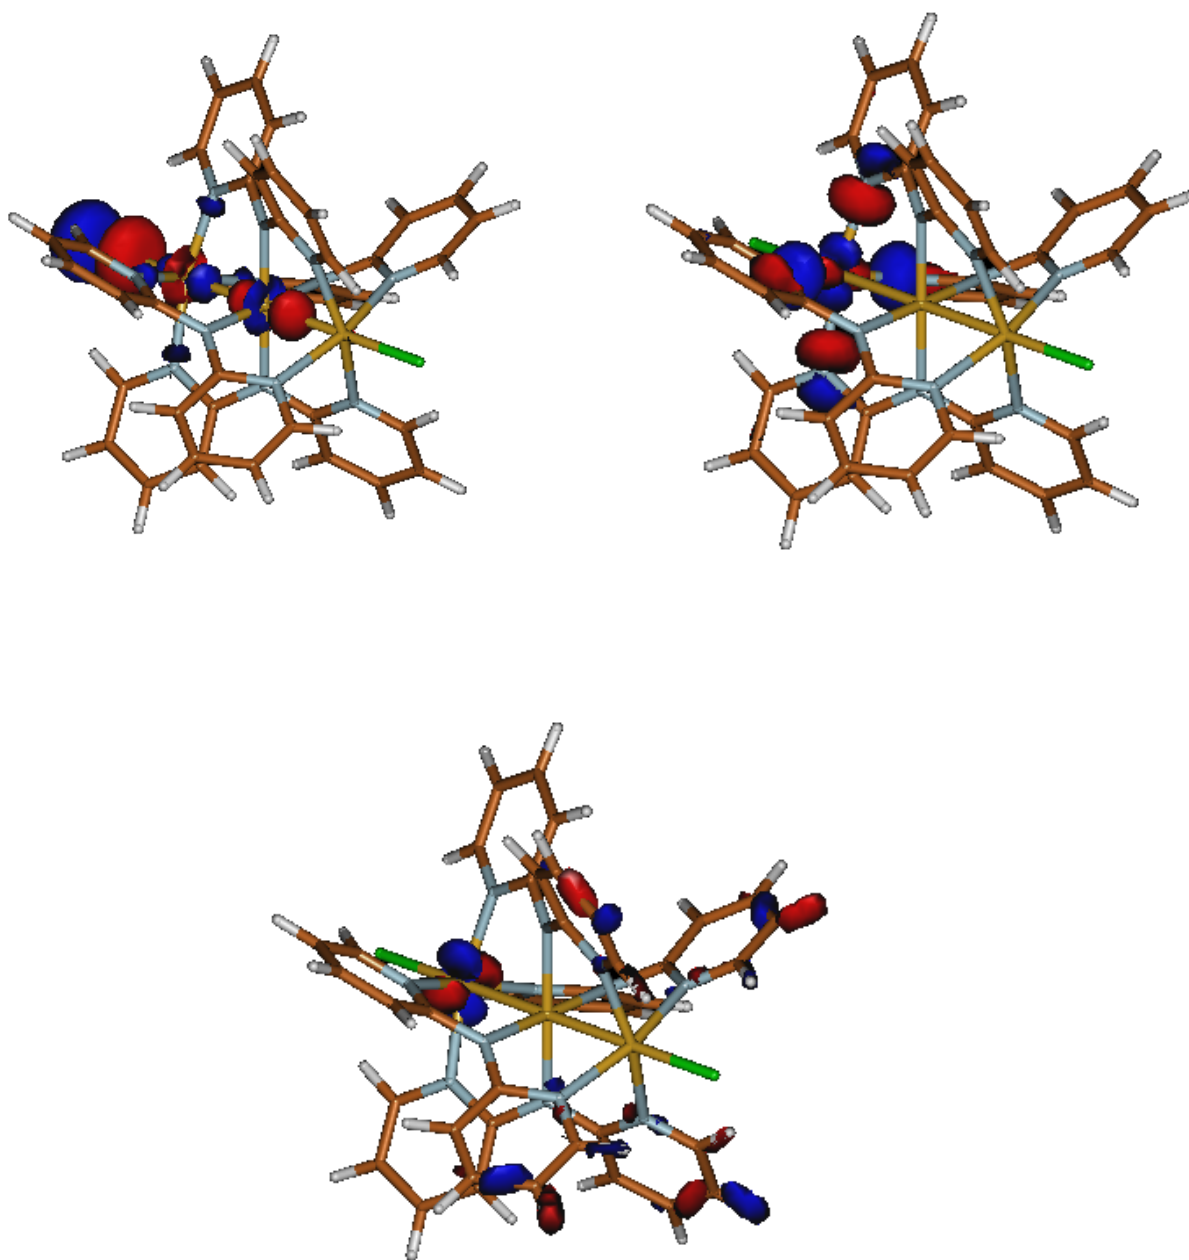

**Table S1.** DFT-optimized cartesian coordinates for compounds **2-8**.

Complex **2**:  $\text{CoPdCo}(\text{dpa})_4(\text{NCS})_2$

Energy of the ground state:  $E(\text{BS1}) = -2823.4711833$  a.u.

Coordinates (Angstroms)

|    | x         | y         | z         |
|----|-----------|-----------|-----------|
| Pd | 0.000000  | 0.000000  | 0.000000  |
| Co | 0.000000  | 0.000000  | 2.524164  |
| Co | 0.000000  | 0.000000  | -2.524164 |
| N  | 0.000000  | 0.000000  | 4.606365  |
| C  | 0.000000  | 0.000000  | 5.795804  |
| S  | 0.000000  | 0.000000  | 7.474622  |
| N  | 0.000000  | 0.000000  | -4.606365 |
| C  | 0.000000  | 0.000000  | -5.795804 |
| S  | 0.000000  | 0.000000  | -7.474622 |
| N  | 0.000000  | 2.047473  | 0.000000  |
| N  | 0.000000  | -2.047473 | 0.000000  |
| N  | -2.047473 | 0.000000  | 0.000000  |
| N  | 2.047473  | 0.000000  | 0.000000  |
| N  | 0.683001  | -2.036743 | 2.249142  |
| N  | -2.036743 | -0.683001 | 2.249142  |
| N  | 2.036743  | 0.683001  | 2.249142  |
| N  | -0.683001 | 2.036743  | 2.249142  |
| N  | -0.683001 | -2.036743 | -2.249142 |
| N  | 2.036743  | -0.683001 | -2.249142 |
| N  | -2.036743 | 0.683001  | -2.249142 |
| N  | 0.683001  | 2.036743  | -2.249142 |
| C  | 0.605951  | -2.708294 | 1.057050  |
| C  | -2.708294 | -0.605951 | 1.057050  |
| C  | 2.708294  | 0.605951  | 1.057050  |
| C  | -0.605951 | 2.708294  | 1.057050  |
| C  | -0.605951 | -2.708294 | -1.057050 |
| C  | 2.708294  | -0.605951 | -1.057050 |
| C  | -2.708294 | 0.605951  | -1.057050 |
| C  | 0.605951  | 2.708294  | -1.057050 |
| C  | 1.208834  | -3.997061 | 0.928057  |
| C  | -3.997061 | -1.208834 | 0.928057  |
| C  | 3.997061  | 1.208834  | 0.928057  |
| C  | -1.208834 | 3.997061  | 0.928057  |
| C  | -1.208834 | -3.997061 | -0.928057 |
| C  | 3.997061  | -1.208834 | -0.928057 |
| C  | -3.997061 | 1.208834  | -0.928057 |
| C  | 1.208834  | 3.997061  | -0.928057 |
| C  | 1.840327  | -4.584907 | 2.022672  |
| C  | -4.584907 | -1.840327 | 2.022672  |
| C  | 4.584907  | 1.840327  | 2.022672  |
| C  | -1.840327 | 4.584907  | 2.022672  |
| C  | -1.840327 | -4.584907 | -2.022672 |
| C  | 4.584907  | -1.840327 | -2.022672 |
| C  | -4.584907 | 1.840327  | -2.022672 |
| C  | 1.840327  | 4.584907  | -2.022672 |
| C  | 1.884868  | -3.891522 | 3.252193  |

|   |           |           |           |
|---|-----------|-----------|-----------|
| C | -3.891522 | -1.884868 | 3.252193  |
| C | 3.891522  | 1.884868  | 3.252193  |
| C | -1.884868 | 3.891522  | 3.252193  |
| C | -1.884868 | -3.891522 | -3.252193 |
| C | 3.891522  | -1.884868 | -3.252193 |
| C | -3.891522 | 1.884868  | -3.252193 |
| C | 1.884868  | 3.891522  | -3.252193 |
| C | 1.306695  | -2.621495 | 3.301232  |
| C | -2.621495 | -1.306695 | 3.301232  |
| C | 2.621495  | 1.306695  | 3.301232  |
| C | -1.306695 | 2.621495  | 3.301232  |
| C | -1.306695 | -2.621495 | -3.301232 |
| C | 2.621495  | -1.306695 | -3.301232 |
| C | -2.621495 | 1.306695  | -3.301232 |
| C | 1.306695  | 2.621495  | -3.301232 |
| H | 1.203974  | -4.492190 | -0.035593 |
| H | -4.492190 | -1.203974 | -0.035593 |
| H | 4.492190  | 1.203974  | -0.035593 |
| H | -1.203974 | 4.492190  | -0.035593 |
| H | -1.203974 | -4.492190 | 0.035593  |
| H | 4.492190  | -1.203974 | 0.035593  |
| H | -4.492190 | 1.203974  | 0.035593  |
| H | 1.203974  | 4.492190  | 0.035593  |
| H | 2.309417  | -5.560273 | 1.918168  |
| H | -5.560273 | -2.309417 | 1.918168  |
| H | 5.560273  | 2.309417  | 1.918168  |
| H | -2.309417 | 5.560273  | 1.918168  |
| H | -2.309417 | -5.560273 | -1.918168 |
| H | 5.560273  | -2.309417 | -1.918168 |
| H | -5.560273 | 2.309417  | -1.918168 |
| H | 2.309417  | 5.560273  | -1.918168 |
| H | 2.360366  | -4.308905 | 4.132850  |
| H | -4.308905 | -2.360366 | 4.132850  |
| H | 4.308905  | 2.360366  | 4.132850  |
| H | -2.360366 | 4.308905  | 4.132850  |
| H | -2.360366 | -4.308905 | -4.132850 |
| H | 4.308905  | -2.360366 | -4.132850 |
| H | -4.308905 | 2.360366  | -4.132850 |
| H | 2.360366  | 4.308905  | -4.132850 |
| H | 1.325146  | -2.034497 | 4.214200  |
| H | -2.034497 | -1.325146 | 4.214200  |
| H | 2.034497  | 1.325146  | 4.214200  |
| H | -1.325146 | 2.034497  | 4.214200  |
| H | -1.325146 | -2.034497 | -4.214200 |
| H | 2.034497  | -1.325146 | -4.214200 |
| H | -2.034497 | 1.325146  | -4.214200 |
| H | 1.325146  | 2.034497  | -4.214200 |

Complex 3: CoNiCo(dpa)<sub>4</sub>Cl<sub>2</sub>

Energy of the ground state: E(BS2)= -2690.0979266 a.u.

Coordinates (Angstroms)

|    | x         | y         | z         |
|----|-----------|-----------|-----------|
| Ni | 0.000000  | 0.000000  | 0.000000  |
| Co | 0.000000  | 0.000000  | 2.414129  |
| Co | 0.000000  | 0.000000  | -2.414129 |
| Cl | 0.000000  | 0.000000  | 4.982498  |
| Cl | 0.000000  | 0.000000  | -4.982498 |
| N  | 0.000000  | 1.905398  | 0.000000  |
| N  | 0.000000  | -1.905398 | 0.000000  |
| N  | -1.905398 | 0.000000  | 0.000000  |
| N  | 1.905398  | 0.000000  | 0.000000  |
| N  | 0.739009  | -1.868658 | 2.224084  |
| N  | -1.868658 | -0.739009 | 2.224084  |
| N  | 1.868658  | 0.739009  | 2.224084  |
| N  | -0.739009 | 1.868658  | 2.224084  |
| N  | -0.739009 | -1.868658 | -2.224084 |
| N  | 1.868658  | -0.739009 | -2.224084 |
| N  | -1.868658 | 0.739009  | -2.224084 |
| N  | 0.739009  | 1.868658  | -2.224084 |
| C  | 0.631027  | -2.557786 | 1.040690  |
| C  | -2.557786 | -0.631027 | 1.040690  |
| C  | 2.557786  | 0.631027  | 1.040690  |
| C  | -0.631027 | 2.557786  | 1.040690  |
| C  | -0.631027 | -2.557786 | -1.040690 |
| C  | 2.557786  | -0.631027 | -1.040690 |
| C  | -2.557786 | 0.631027  | -1.040690 |
| C  | 0.631027  | 2.557786  | -1.040690 |
| C  | 1.237041  | -3.843085 | 0.910728  |
| C  | -3.843085 | -1.237041 | 0.910728  |
| C  | 3.843085  | 1.237041  | 0.910728  |
| C  | -1.237041 | 3.843085  | 0.910728  |
| C  | -1.237041 | -3.843085 | -0.910728 |
| C  | 3.843085  | -1.237041 | -0.910728 |
| C  | -3.843085 | 1.237041  | -0.910728 |
| C  | 1.237041  | 3.843085  | -0.910728 |
| C  | 1.919034  | -4.407809 | 1.986917  |
| C  | -4.407809 | -1.919034 | 1.986917  |
| C  | 4.407809  | 1.919034  | 1.986917  |
| C  | -1.919034 | 4.407809  | 1.986917  |
| C  | -1.919034 | -4.407809 | -1.986917 |
| C  | 4.407809  | -1.919034 | -1.986917 |
| C  | -4.407809 | 1.919034  | -1.986917 |
| C  | 1.919034  | 4.407809  | -1.986917 |
| C  | 2.010154  | -3.689368 | 3.197973  |
| C  | -3.689368 | -2.010154 | 3.197973  |
| C  | 3.689368  | 2.010154  | 3.197973  |
| C  | -2.010154 | 3.689368  | 3.197973  |
| C  | -2.010154 | -3.689368 | -3.197973 |
| C  | 3.689368  | -2.010154 | -3.197973 |
| C  | -3.689368 | 2.010154  | -3.197973 |
| C  | 2.010154  | 3.689368  | -3.197973 |
| C  | 1.418376  | -2.425379 | 3.257551  |

|   |           |           |           |
|---|-----------|-----------|-----------|
| C | -2.425379 | -1.418376 | 3.257551  |
| C | 2.425379  | 1.418376  | 3.257551  |
| C | -1.418376 | 2.425379  | 3.257551  |
| C | -1.418376 | -2.425379 | -3.257551 |
| C | 2.425379  | -1.418376 | -3.257551 |
| C | -2.425379 | 1.418376  | -3.257551 |
| C | 1.418376  | 2.425379  | -3.257551 |
| H | 1.196418  | -4.351335 | -0.045208 |
| H | -4.351335 | -1.196418 | -0.045208 |
| H | 4.351335  | 1.196418  | -0.045208 |
| H | -1.196418 | 4.351335  | -0.045208 |
| H | -1.196418 | -4.351335 | 0.045208  |
| H | 4.351335  | -1.196418 | 0.045208  |
| H | -4.351335 | 1.196418  | 0.045208  |
| H | 1.196418  | 4.351335  | 0.045208  |
| H | 2.390693  | -5.381806 | 1.880241  |
| H | -5.381806 | -2.390693 | 1.880241  |
| H | 5.381806  | 2.390693  | 1.880241  |
| H | -2.390693 | 5.381806  | 1.880241  |
| H | -2.390693 | -5.381806 | -1.880241 |
| H | 5.381806  | -2.390693 | -1.880241 |
| H | -5.381806 | 2.390693  | -1.880241 |
| H | 2.390693  | 5.381806  | -1.880241 |
| H | 2.527288  | -4.084869 | 4.065323  |
| H | -4.084869 | -2.527288 | 4.065323  |
| H | 4.084869  | 2.527288  | 4.065323  |
| H | -2.527288 | 4.084869  | 4.065323  |
| H | -2.527288 | -4.084869 | -4.065323 |
| H | 4.084869  | -2.527288 | -4.065323 |
| H | -4.084869 | 2.527288  | -4.065323 |
| H | 2.527288  | 4.084869  | -4.065323 |
| H | 1.450115  | -1.824048 | 4.160273  |
| H | -1.824048 | -1.450115 | 4.160273  |
| H | 1.824048  | 1.450115  | 4.160273  |
| H | -1.450115 | 1.824048  | 4.160273  |
| H | -1.450115 | -1.824048 | -4.160273 |
| H | 1.824048  | -1.450115 | -4.160273 |
| H | -1.824048 | 1.450115  | -4.160273 |
| H | 1.450115  | 1.824048  | -4.160273 |

Complex 4:  $\text{CoNiCo}(\text{dpa})_4(\text{NCS})_2$

Energy of the ground state:  $E(\text{BS2}) = -2866.0578544$  a.u.

Coordinates (Angstroms)

|    | x         | y         | z         |
|----|-----------|-----------|-----------|
| Ni | 0.000000  | 0.000000  | 0.000000  |
| Co | 0.000000  | 0.000000  | 2.410454  |
| Co | 0.000000  | 0.000000  | -2.410454 |
| N  | 0.000000  | 0.000000  | 4.558862  |
| C  | 0.000000  | 0.000000  | 5.747889  |
| S  | 0.000000  | 0.000000  | 7.430584  |
| N  | 0.000000  | 0.000000  | -4.558862 |
| C  | 0.000000  | 0.000000  | -5.747889 |
| S  | 0.000000  | 0.000000  | -7.430584 |
| N  | 0.000000  | 1.907966  | 0.000000  |
| N  | 0.000000  | -1.907966 | 0.000000  |
| N  | -1.907966 | 0.000000  | 0.000000  |
| N  | 1.907966  | 0.000000  | 0.000000  |
| N  | 0.726012  | -1.868149 | 2.226694  |
| N  | -1.868149 | -0.726012 | 2.226694  |
| N  | 1.868149  | 0.726012  | 2.226694  |
| N  | -0.726012 | 1.868149  | 2.226694  |
| N  | -0.726012 | -1.868149 | -2.226694 |
| N  | 1.868149  | -0.726012 | -2.226694 |
| N  | -1.868149 | 0.726012  | -2.226694 |
| N  | 0.726012  | 1.868149  | -2.226694 |
| C  | 0.623005  | -2.560759 | 1.045677  |
| C  | -2.560759 | -0.623005 | 1.045677  |
| C  | 2.560759  | 0.623005  | 1.045677  |
| C  | -0.623005 | 2.560759  | 1.045677  |
| C  | -0.623005 | -2.560759 | -1.045677 |
| C  | 2.560759  | -0.623005 | -1.045677 |
| C  | -2.560759 | 0.623005  | -1.045677 |
| C  | 0.623005  | 2.560759  | -1.045677 |
| C  | 1.223885  | -3.849666 | 0.927448  |
| C  | -3.849666 | -1.223885 | 0.927448  |
| C  | 3.849666  | 1.223885  | 0.927448  |
| C  | -1.223885 | 3.849666  | 0.927448  |
| C  | -1.223885 | -3.849666 | -0.927448 |
| C  | 3.849666  | -1.223885 | -0.927448 |
| C  | -3.849666 | 1.223885  | -0.927448 |
| C  | 1.223885  | 3.849666  | -0.927448 |
| C  | 1.890118  | -4.414484 | 2.013423  |
| C  | -4.414484 | -1.890118 | 2.013423  |
| C  | 4.414484  | 1.890118  | 2.013423  |
| C  | -1.890118 | 4.414484  | 2.013423  |
| C  | -1.890118 | -4.414484 | -2.013423 |
| C  | 4.414484  | -1.890118 | -2.013423 |
| C  | -4.414484 | 1.890118  | -2.013423 |
| C  | 1.890118  | 4.414484  | -2.013423 |
| C  | 1.973928  | -3.692335 | 3.223271  |
| C  | -3.692335 | -1.973928 | 3.223271  |
| C  | 3.692335  | 1.973928  | 3.223271  |
| C  | -1.973928 | 3.692335  | 3.223271  |
| C  | -1.973928 | -3.692335 | -3.223271 |



|   |           |           |           |
|---|-----------|-----------|-----------|
| C | 3.692335  | -1.973928 | -3.223271 |
| C | -3.692335 | 1.973928  | -3.223271 |
| C | 1.973928  | 3.692335  | -3.223271 |
| C | 1.391664  | -2.424375 | 3.268807  |
| C | -2.424375 | -1.391664 | 3.268807  |
| C | 2.424375  | 1.391664  | 3.268807  |
| C | -1.391664 | 2.424375  | 3.268807  |
| C | -1.391664 | -2.424375 | -3.268807 |
| C | 2.424375  | -1.391664 | -3.268807 |
| C | -2.424375 | 1.391664  | -3.268807 |
| C | 1.391664  | 2.424375  | -3.268807 |
| H | 1.190798  | -4.362736 | -0.026112 |
| H | -4.362736 | -1.190798 | -0.026112 |
| H | 4.362736  | 1.190798  | -0.026112 |
| H | -1.190798 | 4.362736  | -0.026112 |
| H | -1.190798 | -4.362736 | 0.026112  |
| H | 4.362736  | -1.190798 | 0.026112  |
| H | -4.362736 | 1.190798  | 0.026112  |
| H | 1.190798  | 4.362736  | 0.026112  |
| H | 2.355905  | -5.392030 | 1.916085  |
| H | -5.392030 | -2.355905 | 1.916085  |
| H | 5.392030  | 2.355905  | 1.916085  |
| H | -2.355905 | 5.392030  | 1.916085  |
| H | -2.355905 | -5.392030 | -1.916085 |
| H | 5.392030  | -2.355905 | -1.916085 |
| H | -5.392030 | 2.355905  | -1.916085 |
| H | 2.355905  | 5.392030  | -1.916085 |
| H | 2.479499  | -4.087307 | 4.097377  |
| H | -4.087307 | -2.479499 | 4.097377  |
| H | 4.087307  | 2.479499  | 4.097377  |
| H | -2.479499 | 4.087307  | 4.097377  |
| H | -2.479499 | -4.087307 | -4.097377 |
| H | 4.087307  | -2.479499 | -4.097377 |
| H | -4.087307 | 2.479499  | -4.097377 |
| H | 2.479499  | 4.087307  | -4.097377 |
| H | 1.431763  | -1.820158 | 4.167426  |
| H | -1.820158 | -1.431763 | 4.167426  |
| H | 1.820158  | 1.431763  | 4.167426  |
| H | -1.431763 | 1.820158  | 4.167426  |
| H | -1.431763 | -1.820158 | -4.167426 |
| H | 1.820158  | -1.431763 | -4.167426 |
| H | -1.820158 | 1.431763  | -4.167426 |
| H | 1.431763  | 1.820158  | -4.167426 |

Complex 5: RhNiRh(dpa)<sub>4</sub>Cl<sub>2</sub>

Energy of the ground state: E(BS2)= -2618.9448599 a.u.

Coordinates (Angstroms)

|    | x         | y         | z         |
|----|-----------|-----------|-----------|
| Ni | 0.000000  | 0.000000  | 0.000000  |
| Rh | 0.000000  | 0.000000  | 2.413148  |
| Rh | 0.000000  | 0.000000  | -2.413148 |
| Cl | 0.000000  | 0.000000  | 5.123833  |
| Cl | 0.000000  | 0.000000  | -5.123833 |
| N  | 0.000000  | 1.931359  | 0.000000  |
| N  | 0.000000  | -1.931359 | 0.000000  |
| N  | -1.931359 | 0.000000  | 0.000000  |
| N  | 1.931359  | 0.000000  | 0.000000  |
| N  | 0.710671  | -1.954663 | 2.244610  |
| N  | -1.954663 | -0.710671 | 2.244610  |
| N  | 1.954663  | 0.710671  | 2.244610  |
| N  | -0.710671 | 1.954663  | 2.244610  |
| N  | -0.710671 | -1.954663 | -2.244610 |
| N  | 1.954663  | -0.710671 | -2.244610 |
| N  | -1.954663 | 0.710671  | -2.244610 |
| N  | 0.710671  | 1.954663  | -2.244610 |
| C  | 0.628769  | -2.601500 | 1.034950  |
| C  | -2.601500 | -0.628769 | 1.034950  |
| C  | 2.601500  | 0.628769  | 1.034950  |
| C  | -0.628769 | 2.601500  | 1.034950  |
| C  | -0.628769 | -2.601500 | -1.034950 |
| C  | 2.601500  | -0.628769 | -1.034950 |
| C  | -2.601500 | 0.628769  | -1.034950 |
| C  | 0.628769  | 2.601500  | -1.034950 |
| C  | 1.251818  | -3.875636 | 0.878707  |
| C  | -3.875636 | -1.251818 | 0.878707  |
| C  | 3.875636  | 1.251818  | 0.878707  |
| C  | -1.251818 | 3.875636  | 0.878707  |
| C  | -1.251818 | -3.875636 | -0.878707 |
| C  | 3.875636  | -1.251818 | -0.878707 |
| C  | -3.875636 | 1.251818  | -0.878707 |
| C  | 1.251818  | 3.875636  | -0.878707 |
| C  | 1.900342  | -4.477563 | 1.955855  |
| C  | -4.477563 | -1.900342 | 1.955855  |
| C  | 4.477563  | 1.900342  | 1.955855  |
| C  | -1.900342 | 4.477563  | 1.955855  |
| C  | -1.900342 | -4.477563 | -1.955855 |
| C  | 4.477563  | -1.900342 | -1.955855 |
| C  | -4.477563 | 1.900342  | -1.955855 |
| C  | 1.900342  | 4.477563  | -1.955855 |
| C  | 1.946224  | -3.807008 | 3.197229  |
| C  | -3.807008 | -1.946224 | 3.197229  |
| C  | 3.807008  | 1.946224  | 3.197229  |
| C  | -1.946224 | 3.807008  | 3.197229  |
| C  | -1.946224 | -3.807008 | -3.197229 |
| C  | 3.807008  | -1.946224 | -3.197229 |
| C  | -3.807008 | 1.946224  | -3.197229 |
| C  | 1.946224  | 3.807008  | -3.197229 |
| C  | 1.353969  | -2.545377 | 3.283326  |

|   |           |           |           |
|---|-----------|-----------|-----------|
| C | -2.545377 | -1.353969 | 3.283326  |
| C | 2.545377  | 1.353969  | 3.283326  |
| C | -1.353969 | 2.545377  | 3.283326  |
| C | -1.353969 | -2.545377 | -3.283326 |
| C | 2.545377  | -1.353969 | -3.283326 |
| C | -2.545377 | 1.353969  | -3.283326 |
| C | 1.353969  | 2.545377  | -3.283326 |
| H | 1.240765  | -4.351579 | -0.094737 |
| H | -4.351579 | -1.240765 | -0.094737 |
| H | 4.351579  | 1.240765  | -0.094737 |
| H | -1.240765 | 4.351579  | -0.094737 |
| H | -1.240765 | -4.351579 | 0.094737  |
| H | 4.351579  | -1.240765 | 0.094737  |
| H | -4.351579 | 1.240765  | 0.094737  |
| H | 1.240765  | 4.351579  | 0.094737  |
| H | 2.379775  | -5.445106 | 1.828293  |
| H | -5.445106 | -2.379775 | 1.828293  |
| H | 5.445106  | 2.379775  | 1.828293  |
| H | -2.379775 | 5.445106  | 1.828293  |
| H | -2.379775 | -5.445106 | -1.828293 |
| H | 5.445106  | -2.379775 | -1.828293 |
| H | -5.445106 | 2.379775  | -1.828293 |
| H | 2.379775  | 5.445106  | -1.828293 |
| H | 2.433304  | -4.235759 | 4.066158  |
| H | -4.235759 | -2.433304 | 4.066158  |
| H | 4.235759  | 2.433304  | 4.066158  |
| H | -2.433304 | 4.235759  | 4.066158  |
| H | -2.433304 | -4.235759 | -4.066158 |
| H | 4.235759  | -2.433304 | -4.066158 |
| H | -4.235759 | 2.433304  | -4.066158 |
| H | 2.433304  | 4.235759  | -4.066158 |
| H | 1.358979  | -1.969373 | 4.204009  |
| H | -1.969373 | -1.358979 | 4.204009  |
| H | 1.969373  | 1.358979  | 4.204009  |
| H | -1.358979 | 1.969373  | 4.204009  |
| H | -1.358979 | -1.969373 | -4.204009 |
| H | 1.969373  | -1.358979 | -4.204009 |
| H | -1.969373 | 1.358979  | -4.204009 |
| H | 1.358979  | 1.969373  | -4.204009 |

Complex 6: RhNiRh(dpa)<sub>4</sub>(NCS)<sub>2</sub>

Energy of the ground state: E(BS2)= -2794.8924797 a.u.

Coordinates (Angstroms)

|    | x         | y         | z         |
|----|-----------|-----------|-----------|
| Ni | 0.000000  | 0.000000  | 0.000000  |
| Rh | 0.000000  | 0.000000  | 2.411667  |
| Rh | 0.000000  | 0.000000  | -2.411667 |
| N  | 0.000000  | 0.000000  | 4.716989  |
| C  | 0.000000  | 0.000000  | 5.906272  |
| S  | 0.000000  | 0.000000  | 7.591465  |
| N  | 0.000000  | 0.000000  | -4.716989 |
| C  | 0.000000  | 0.000000  | -5.906272 |
| S  | 0.000000  | 0.000000  | -7.591465 |
| N  | 0.000000  | 1.932320  | 0.000000  |
| N  | 0.000000  | -1.932320 | 0.000000  |
| N  | -1.932320 | 0.000000  | 0.000000  |
| N  | 1.932320  | 0.000000  | 0.000000  |
| N  | 0.703569  | -1.955296 | 2.245787  |
| N  | -1.955296 | -0.703569 | 2.245787  |
| N  | 1.955296  | 0.703569  | 2.245787  |
| N  | -0.703569 | 1.955296  | 2.245787  |
| N  | -0.703569 | -1.955296 | -2.245787 |
| N  | 1.955296  | -0.703569 | -2.245787 |
| N  | -1.955296 | 0.703569  | -2.245787 |
| N  | 0.703569  | 1.955296  | -2.245787 |
| C  | 0.624790  | -2.603163 | 1.037403  |
| C  | -2.603163 | -0.624790 | 1.037403  |
| C  | 2.603163  | 0.624790  | 1.037403  |
| C  | -0.624790 | 2.603163  | 1.037403  |
| C  | -0.624790 | -2.603163 | -1.037403 |
| C  | 2.603163  | -0.624790 | -1.037403 |
| C  | -2.603163 | 0.624790  | -1.037403 |
| C  | 0.624790  | 2.603163  | -1.037403 |
| C  | 1.244490  | -3.879503 | 0.887350  |
| C  | -3.879503 | -1.244490 | 0.887350  |
| C  | 3.879503  | 1.244490  | 0.887350  |
| C  | -1.244490 | 3.879503  | 0.887350  |
| C  | -1.244490 | -3.879503 | -0.887350 |
| C  | 3.879503  | -1.244490 | -0.887350 |
| C  | -3.879503 | 1.244490  | -0.887350 |
| C  | 1.244490  | 3.879503  | -0.887350 |
| C  | 1.883048  | -4.482535 | 1.969816  |
| C  | -4.482535 | -1.883048 | 1.969816  |
| C  | 4.482535  | 1.883048  | 1.969816  |
| C  | -1.883048 | 4.482535  | 1.969816  |
| C  | -1.883048 | -4.482535 | -1.969816 |
| C  | 4.482535  | -1.883048 | -1.969816 |
| C  | -4.482535 | 1.883048  | -1.969816 |
| C  | 1.883048  | 4.482535  | -1.969816 |
| C  | 1.924073  | -3.810879 | 3.211109  |
| C  | -3.810879 | -1.924073 | 3.211109  |
| C  | 3.810879  | 1.924073  | 3.211109  |
| C  | -1.924073 | 3.810879  | 3.211109  |
| C  | -1.924073 | -3.810879 | -3.211109 |

|   |           |           |           |
|---|-----------|-----------|-----------|
| C | 3.810879  | -1.924073 | -3.211109 |
| C | -3.810879 | 1.924073  | -3.211109 |
| C | 1.924073  | 3.810879  | -3.211109 |
| C | 1.337845  | -2.546898 | 3.289346  |
| C | -2.546898 | -1.337845 | 3.289346  |
| C | 2.546898  | 1.337845  | 3.289346  |
| C | -1.337845 | 2.546898  | 3.289346  |
| C | -1.337845 | -2.546898 | -3.289346 |
| C | 2.546898  | -1.337845 | -3.289346 |
| C | -2.546898 | 1.337845  | -3.289346 |
| C | 1.337845  | 2.546898  | -3.289346 |
| H | 1.237919  | -4.358131 | -0.084734 |
| H | -4.358131 | -1.237919 | -0.084734 |
| H | 4.358131  | 1.237919  | -0.084734 |
| H | -1.237919 | 4.358131  | -0.084734 |
| H | -1.237919 | -4.358131 | 0.084734  |
| H | 4.358131  | -1.237919 | 0.084734  |
| H | -4.358131 | 1.237919  | 0.084734  |
| H | 1.237919  | 4.358131  | 0.084734  |
| H | 2.358583  | -5.452409 | 1.847366  |
| H | -5.452409 | -2.358583 | 1.847366  |
| H | 5.452409  | 2.358583  | 1.847366  |
| H | -2.358583 | 5.452409  | 1.847366  |
| H | -2.358583 | -5.452409 | -1.847366 |
| H | 5.452409  | -2.358583 | -1.847366 |
| H | -5.452409 | 2.358583  | -1.847366 |
| H | 2.358583  | 5.452409  | -1.847366 |
| H | 2.403373  | -4.240284 | 4.083755  |
| H | -4.240284 | -2.403373 | 4.083755  |
| H | 4.240284  | 2.403373  | 4.083755  |
| H | -2.403373 | 4.240284  | 4.083755  |
| H | -2.403373 | -4.240284 | -4.083755 |
| H | 4.240284  | -2.403373 | -4.083755 |
| H | -4.240284 | 2.403373  | -4.083755 |
| H | 2.403373  | 4.240284  | -4.083755 |
| H | 1.348056  | -1.971174 | 4.208534  |
| H | -1.971174 | -1.348056 | 4.208534  |
| H | 1.971174  | 1.348056  | 4.208534  |
| H | -1.348056 | 1.971174  | 4.208534  |
| H | -1.348056 | -1.971174 | -4.208534 |
| H | 1.971174  | -1.348056 | -4.208534 |
| H | -1.971174 | 1.348056  | -4.208534 |
| H | 1.348056  | 1.971174  | -4.208534 |

Complex 7: RhPdRh(dpa)<sub>4</sub>Cl<sub>2</sub>

Energy of the ground state: E(BS2)= -2576.349926 a.u.

Coordinates (Angstroms)

|    | x         | y         | z         |
|----|-----------|-----------|-----------|
| Pd | 0.000000  | 0.000000  | 0.000000  |
| Rh | 0.000000  | 0.000000  | 2.463653  |
| Rh | 0.000000  | 0.000000  | -2.463653 |
| Cl | 0.000000  | 0.000000  | 5.206638  |
| Cl | 0.000000  | 0.000000  | -5.206638 |
| N  | 0.000000  | 2.030584  | 0.000000  |
| N  | 0.000000  | -2.030584 | 0.000000  |
| N  | -2.030584 | 0.000000  | 0.000000  |
| N  | 2.030584  | 0.000000  | 0.000000  |
| N  | 0.616272  | -2.007679 | 2.282621  |
| N  | -2.007679 | -0.616272 | 2.282621  |
| N  | 2.007679  | 0.616272  | 2.282621  |
| N  | -0.616272 | 2.007679  | 2.282621  |
| N  | -0.616272 | -2.007679 | -2.282621 |
| N  | 2.007679  | -0.616272 | -2.282621 |
| N  | -2.007679 | 0.616272  | -2.282621 |
| N  | 0.616272  | 2.007679  | -2.282621 |
| C  | 0.570388  | -2.681869 | 1.081743  |
| C  | -2.681869 | -0.570388 | 1.081743  |
| C  | 2.681869  | 0.570388  | 1.081743  |
| C  | -0.570388 | 2.681869  | 1.081743  |
| C  | -0.570388 | -2.681869 | -1.081743 |
| C  | 2.681869  | -0.570388 | -1.081743 |
| C  | -2.681869 | 0.570388  | -1.081743 |
| C  | 0.570388  | 2.681869  | -1.081743 |
| C  | 1.176835  | -3.969403 | 0.975026  |
| C  | -3.969403 | -1.176835 | 0.975026  |
| C  | 3.969403  | 1.176835  | 0.975026  |
| C  | -1.176835 | 3.969403  | 0.975026  |
| C  | -1.176835 | -3.969403 | -0.975026 |
| C  | 3.969403  | -1.176835 | -0.975026 |
| C  | -3.969403 | 1.176835  | -0.975026 |
| C  | 1.176835  | 3.969403  | -0.975026 |
| C  | 1.764723  | -4.566592 | 2.088562  |
| C  | -4.566592 | -1.764723 | 2.088562  |
| C  | 4.566592  | 1.764723  | 2.088562  |
| C  | -1.764723 | 4.566592  | 2.088562  |
| C  | -1.764723 | -4.566592 | -2.088562 |
| C  | 4.566592  | -1.764723 | -2.088562 |
| C  | -4.566592 | 1.764723  | -2.088562 |
| C  | 1.764723  | 4.566592  | -2.088562 |
| C  | 1.765617  | -3.876727 | 3.319240  |
| C  | -3.876727 | -1.765617 | 3.319240  |
| C  | 3.876727  | 1.765617  | 3.319240  |
| C  | -1.765617 | 3.876727  | 3.319240  |
| C  | -1.765617 | -3.876727 | -3.319240 |
| C  | 3.876727  | -1.765617 | -3.319240 |
| C  | -3.876727 | 1.765617  | -3.319240 |
| C  | 1.765617  | 3.876727  | -3.319240 |
| C  | 1.199497  | -2.601014 | 3.356583  |

|   |           |           |           |
|---|-----------|-----------|-----------|
| C | -2.601014 | -1.199497 | 3.356583  |
| C | 2.601014  | 1.199497  | 3.356583  |
| C | -1.199497 | 2.601014  | 3.356583  |
| C | -1.199497 | -2.601014 | -3.356583 |
| C | 2.601014  | -1.199497 | -3.356583 |
| C | -2.601014 | 1.199497  | -3.356583 |
| C | 1.199497  | 2.601014  | -3.356583 |
| H | 1.204052  | -4.458575 | 0.008748  |
| H | -4.458575 | -1.204052 | 0.008748  |
| H | 4.458575  | 1.204052  | 0.008748  |
| H | -1.204052 | 4.458575  | 0.008748  |
| H | -1.204052 | -4.458575 | -0.008748 |
| H | 4.458575  | -1.204052 | -0.008748 |
| H | -4.458575 | 1.204052  | -0.008748 |
| H | 1.204052  | 4.458575  | -0.008748 |
| H | 2.231506  | -5.544311 | 1.997005  |
| H | -5.544311 | -2.231506 | 1.997005  |
| H | 5.544311  | 2.231506  | 1.997005  |
| H | -2.231506 | 5.544311  | 1.997005  |
| H | -2.231506 | -5.544311 | -1.997005 |
| H | 5.544311  | -2.231506 | -1.997005 |
| H | -5.544311 | 2.231506  | -1.997005 |
| H | 2.231506  | 5.544311  | -1.997005 |
| H | 2.202803  | -4.299176 | 4.217259  |
| H | -4.299176 | -2.202803 | 4.217259  |
| H | 4.299176  | 2.202803  | 4.217259  |
| H | -2.202803 | 4.299176  | 4.217259  |
| H | -2.202803 | -4.299176 | -4.217259 |
| H | 4.299176  | -2.202803 | -4.217259 |
| H | -4.299176 | 2.202803  | -4.217259 |
| H | 2.202803  | 4.299176  | -4.217259 |
| H | 1.182704  | -2.009514 | 4.267736  |
| H | -2.009514 | -1.182704 | 4.267736  |
| H | 2.009514  | 1.182704  | 4.267736  |
| H | -1.182704 | 2.009514  | 4.267736  |
| H | -1.182704 | -2.009514 | -4.267736 |
| H | 2.009514  | -1.182704 | -4.267736 |
| H | -2.009514 | 1.182704  | -4.267736 |
| H | 1.182704  | 2.009514  | -4.267736 |

Complex 8: RhPdRh(dpa)<sub>4</sub>(NCS)<sub>2</sub>

Energy of the ground state: E(BS2)= -2752.2991733 a.u.

Coordinates (Angstroms)

|    | x         | y         | z         |
|----|-----------|-----------|-----------|
| Pd | 0.000000  | 0.000000  | 0.000000  |
| Rh | 0.000000  | 0.000000  | 2.463020  |
| Rh | 0.000000  | 0.000000  | -2.463020 |
| N  | 0.000000  | 0.000000  | 4.800475  |
| C  | 0.000000  | 0.000000  | 5.990405  |
| S  | 0.000000  | 0.000000  | 7.675622  |
| N  | 0.000000  | 0.000000  | -4.800475 |
| C  | 0.000000  | 0.000000  | -5.990405 |
| S  | 0.000000  | 0.000000  | -7.675622 |
| N  | 0.000000  | 2.032069  | 0.000000  |
| N  | 0.000000  | -2.032069 | 0.000000  |
| N  | -2.032069 | 0.000000  | 0.000000  |
| N  | 2.032069  | 0.000000  | 0.000000  |
| N  | 0.599290  | -2.010118 | 2.286251  |
| N  | -2.010118 | -0.599290 | 2.286251  |
| N  | 2.010118  | 0.599290  | 2.286251  |
| N  | -0.599290 | 2.010118  | 2.286251  |
| N  | -0.599290 | -2.010118 | -2.286251 |
| N  | 2.010118  | -0.599290 | -2.286251 |
| N  | -2.010118 | 0.599290  | -2.286251 |
| N  | 0.599290  | 2.010118  | -2.286251 |
| C  | 0.561273  | -2.684438 | 1.086196  |
| C  | -2.684438 | -0.561273 | 1.086196  |
| C  | 2.684438  | 0.561273  | 1.086196  |
| C  | -0.561273 | 2.684438  | 1.086196  |
| C  | -0.561273 | -2.684438 | -1.086196 |
| C  | 2.684438  | -0.561273 | -1.086196 |
| C  | -2.684438 | 0.561273  | -1.086196 |
| C  | 0.561273  | 2.684438  | -1.086196 |
| C  | 1.163833  | -3.974502 | 0.987336  |
| C  | -3.974502 | -1.163833 | 0.987336  |
| C  | 3.974502  | 1.163833  | 0.987336  |
| C  | -1.163833 | 3.974502  | 0.987336  |
| C  | -1.163833 | -3.974502 | -0.987336 |
| C  | 3.974502  | -1.163833 | -0.987336 |
| C  | -3.974502 | 1.163833  | -0.987336 |
| C  | 1.163833  | 3.974502  | -0.987336 |
| C  | 1.735059  | -4.574450 | 2.107899  |
| C  | -4.574450 | -1.735059 | 2.107899  |
| C  | 4.574450  | 1.735059  | 2.107899  |
| C  | -1.735059 | 4.574450  | 2.107899  |
| C  | -1.735059 | -4.574450 | -2.107899 |
| C  | 4.574450  | -1.735059 | -2.107899 |
| C  | -4.574450 | 1.735059  | -2.107899 |
| C  | 1.735059  | 4.574450  | -2.107899 |
| C  | 1.724403  | -3.885077 | 3.339264  |
| C  | -3.885077 | -1.724403 | 3.339264  |
| C  | 3.885077  | 1.724403  | 3.339264  |
| C  | -1.724403 | 3.885077  | 3.339264  |
| C  | -1.724403 | -3.885077 | -3.339264 |



|   |           |           |           |
|---|-----------|-----------|-----------|
| C | 3.885077  | -1.724403 | -3.339264 |
| C | -3.885077 | 1.724403  | -3.339264 |
| C | 1.724403  | 3.885077  | -3.339264 |
| C | 1.166038  | -2.606842 | 3.367037  |
| C | -2.606842 | -1.166038 | 3.367037  |
| C | 2.606842  | 1.166038  | 3.367037  |
| C | -1.166038 | 2.606842  | 3.367037  |
| C | -1.166038 | -2.606842 | -3.367037 |
| C | 2.606842  | -1.166038 | -3.367037 |
| C | -2.606842 | 1.166038  | -3.367037 |
| C | 1.166038  | 2.606842  | -3.367037 |
| H | 1.200291  | -4.465075 | 0.022170  |
| H | -4.465075 | -1.200291 | 0.022170  |
| H | 4.465075  | 1.200291  | 0.022170  |
| H | -1.200291 | 4.465075  | 0.022170  |
| H | -1.200291 | -4.465075 | -0.022170 |
| H | 4.465075  | -1.200291 | -0.022170 |
| H | -4.465075 | 1.200291  | -0.022170 |
| H | 1.200291  | 4.465075  | -0.022170 |
| H | 2.197745  | -5.554418 | 2.022497  |
| H | -5.554418 | -2.197745 | 2.022497  |
| H | 5.554418  | 2.197745  | 2.022497  |
| H | -2.197745 | 5.554418  | 2.022497  |
| H | -2.197745 | -5.554418 | -2.022497 |
| H | 5.554418  | -2.197745 | -2.022497 |
| H | -5.554418 | 2.197745  | -2.022497 |
| H | 2.197745  | 5.554418  | -2.022497 |
| H | 2.147864  | -4.309523 | 4.242642  |
| H | -4.309523 | -2.147864 | 4.242642  |
| H | 4.309523  | 2.147864  | 4.242642  |
| H | -2.147864 | 4.309523  | 4.242642  |
| H | -2.147864 | -4.309523 | -4.242642 |
| H | 4.309523  | -2.147864 | -4.242642 |
| H | -4.309523 | 2.147864  | -4.242642 |
| H | 2.147864  | 4.309523  | -4.242642 |
| H | 1.149225  | -2.017071 | 4.277097  |
| H | -2.017071 | -1.149225 | 4.277097  |
| H | 2.017071  | 1.149225  | 4.277097  |
| H | -1.149225 | 2.017071  | 4.277097  |
| H | -1.149225 | -2.017071 | -4.277097 |
| H | 2.017071  | -1.149225 | -4.277097 |
| H | -2.017071 | 1.149225  | -4.277097 |
| H | 1.149225  | 2.017071  | -4.277097 |
